# Supplementary material for: A quinoxaline-based porous organic polymer containing copper nanoparticles CuNPs@Q-POP as a robust nanocatalyst toward C–N coupling reaction
Source: Royal Society of Chemistry journal article supplement (doi:10.1039/d0ra10741g), 2021-01-01
Supplement: d0ra10741g1.pdf [file d0ra10741g1.pdf]

# **A Quinoxaline-based Porous Organic Polymer Containing Copper Nanoparticles CuNPs@Q-POP as a Robust Nanocatalyst toward C-N Coupling Reaction**

Forough Gorginpour, Hassan Zali-Boeini \*, Hadi Amiri Rudbari

Department of Chemistry, University of Isfahan, 81746-73441, Isfahan, Iran

Author e-mail: [h.zali@chem.ui.ac.ir](mailto:h.zali@chem.ui.ac.ir); Phone: +98-37934925

## Experimental Section

### Materials and instruments:

All chemicals were purchased from commercial sources and used without further purification. Solvents used in this study were dried and purified using standard procedures before usage. The powder X-ray diffraction (XRD) patterns of samples were performed on a D8 Advance Bruker X-ray diffractometer using Cu K $\alpha$  ( $\lambda=1.54$  °A) radiation. Nitrogen sorption isotherms were carried out using a BEL sorb-mini 2 at 77 K. The specific surface areas and the pore size distributions of materials were determined by the Brunauer-Emmett-Teller (BET) method and the Barrett-Joyner-Halenda (BJH) model, respectively. Before analysis, the samples were outgassed at 120 °C for 4h under vacuum. The Fourier transform infrared (FT-IR) spectra were recorded on Jasco FTIR-6300 spectrometer as KBr pellets. Thermal gravimetric analysis (TGA) was obtained using an SDT Q600 instrument by heating samples from 25 to 600 °C in a dynamic argon atmosphere with a heating rate of 10°C min<sup>-1</sup>. Field-emission scanning electron (FE-SEM) microscopy and energy-dispersive X-ray spectroscopy (EDX) analysis were carried out on a Tescan Mira3 scanning electron microscope. Transmission electron microscopy (TEM) images were performed on Philips-CM120. Inductively coupled plasma (ICP) was measured on an Analytic Jena PQ9000 for the determination of Cu content. Conversion and selectivity were determined by GC-FID on a Shimadzu GC-16A instrument using a 2 m column packed with silicon DC-200 or carbowax 20 M using EtOAc-Hexane (1:5) as eluent. <sup>1</sup>H NMR (400 MHz) and <sup>13</sup>C NMR (100 MHz) spectra were recorded on a Bruker Avance 400 MHz NMR spectrometer.

### Synthesis of bis(salicylidene)-*O*-phenylene diamine (A):

This compound was prepared according to the procedure reported in the literature. *O*-phenylenediamine (2.16 g, 20 mmol) and salicylaldehyde (4.24 mL, 40 mmol) were dissolved in dry methanol (40 mL) at room temperature. After stirring for 16 h, the resulting solid was separated by filtration. The obtained solid was washed with methanol and dried *in vacuo* to afford compound (A) as yellow powders (6 g, 95%).

### Synthesis of 2,3-di(2-hydroxyphenyl)1,2-dihydro quinoxaline (B):

Under an argon atmosphere, NaCN (0.226 g, 4.6 mmol) was introduced into a solution of bis(salicylidene)-*O*-phenylenediamine (3.7 g, 11.8 mmol) in dry DMF (35 mL), and the mixture was stirred at room temperature for 48 h. Subsequently, the reaction mixture was poured into ice water (50 mL). The resultant solid was filtered *via* Buchner funnel, washed with water for several times and dried. The crude product was purified by recrystallization in acetonitrile. Finally, the pure desired product was obtained as an orange solid (2.96 g, 80%). <sup>1</sup>H-NMR (400 MHz, CDCl<sub>3</sub>):  $\delta$  14.92 (s, 1H), 10.18 (s, 1H), 7.44 (d,  $J=8$  Hz, 1H), 7.33-7.29 (m, 1H), 7.24 (d,  $J=8$  Hz, 1H), 7.08-7.04 (m, 1H), 7.01-6.96 (m, 1H), 6.92-6.86 (m, 4H), 6.81-

6.77 (m, 1H), 6.66 (s, 1H), 6.64 (s, 1H), 6.62-6.59 (m, 1H), 6.225 (d,  $J=4$  Hz, 1H);  $^{13}\text{C}$ -NMR (100 MHz,  $\text{CDCl}_3$ ):  $\delta$  161.7, 161.1, 152.6, 136.8, 132.6, 129.3, 129.1, 128.9, 127.4, 127.0, 125.7, 119.4, 118.5, 117.5, 117.2, 117.1, 115.7, 114.1, 45.5.

### **Synthesis of allyl-functionalized 2,3-di(2-hydroxy phenyl)1,2-dihydroquinoxaline (C):**

A solution of 2,3-di(2-hydroxyphenyl)1,2-dihydro quinoxaline (2.96 g, 9.4 mmol) in acetone (60 mL) was shaken with  $\text{K}_2\text{CO}_3$  (3.9 g, 28.2 mmol). Allyl bromide (2.44 mL, 28.2 mmol) was then added slowly to the solution. After the mixture was stirred at room temperature for 48 h, water was added (20 mL) and the product was extracted with ethyl acetate (3 $\times$ 30 mL) and dried over  $\text{MgSO}_4$ . The solvent was evaporated under vacuum and the crude product was purified by column chromatography on silica gel (EtOAc/hexane 1:4) to yield allyl functionalized 2,3-di(2-hydroxyphenyl)1,2-dihydroquinoxaline monomer as an orange powder (1.86 g, 50%).  $^1\text{H}$ -NMR (400 MHz,  $\text{CDCl}_3$ ):  $\delta$  14.98 (s, 1H), 7.31 (d,  $J=8$  Hz, 1H), 7.29 (d,  $J=8$  Hz, 1H), 7.17-7.02 (m, 4H), 6.88 (d,  $J=8$  Hz, 1H), 6.79 (d,  $J=8$  Hz, 1H), 6.71-6.64 (m, 3H), 6.55 (d,  $J=8$  Hz, 1H), 6.30 (s, 1H), 6.14-6.07 (m, 1H), 5.61-5.54 (m, 1H), 5.46 (dd,  $J=18$  Hz,  $J=4$  Hz, 1H), 5.32 (dd,  $J=10$  Hz,  $J=4$  Hz, 1H), 5.03 (dd,  $J=18$  Hz,  $J=4$  Hz, 1H), 4.97 (dd,  $J=12$  Hz,  $J=4$  Hz, 1H), 4.63-4.62 (m, 2H), 3.92-3.91 (m, 2H).  $^{13}\text{C}$  NMR (100 MHz,  $\text{CDCl}_3$ ):  $\delta$  161.5, 160.0, 152.3, 135.8, 132.6, 131.9, 131.3, 129.9, 128.9, 128.1, 127.9, 126.4, 126.3, 125.5, 120.8, 117.2, 116.9, 116.6, 116.5, 115.5, 111.3, 110.5, 68.0, 50.6, 50.5.

### **Synthesis of Q-POP:**

Radical copolymerization of ligand **C** with divinylbenzene (DVB) as cross-linker, in the presence of azobisisobutyronitrile (AIBN) as a radical initiator, was used to synthesis the nanoporous polymer under solvothermal conditions. Typically, the monomer **C** (1 g, 2.52 mmol) and divinylbenzene (1.43 mL, 10.1 mmol) were dissolved in dry DMF (10 mL), followed by the addition of AIBN (0.05 g). The reaction mixture was degassed with argon gas for 30 min, poured into a 50 mL autoclave (stainless steel 316), and heated at 100 °C for 24 h. After cooling to room temperature, water (30 mL) was added to the reaction mixture and the resulting polymer was filtered and washed with excess water. Additionally, the as-prepared polymer was further washed with methanol for the elimination of any unreacted monomer **C**. Finally, the desired polymer was obtained as a yellow powder and dried in an oven at 90-100 °C overnight.

### **Synthesis of CuNPs@Q-POP(7.3% Cu):**

To a round-bottom flask were introduced Q-POP (1.5 g), MeOH (50 mL), and  $\text{Et}_3\text{N}$  (1 mL). The resultant suspension was allowed to stir at room temperature for 1 h. Then,  $\text{Cu}(\text{NO}_3)_2 \cdot 3\text{H}_2\text{O}$  (0.8 g) in MeOH (20 mL) was added to the above suspension and refluxed for about 12 h. The green  $\text{Cu}^{2+}$ @Q-POP was isolated by filtration, washed with MeOH for removal of excess  $\text{Cu}(\text{NO}_3)_2 \cdot 3\text{H}_2\text{O}$ , and then dried *in vacuo* for

overnight. Next, CuNPs@Q-POP were synthesized by the reduction of Cu<sup>2+</sup>@Q-POP. An aqueous solution of hydrazine hydrate (10 mL, 35%) was added dropwise with vigorous stirring under argon atmosphere to a mixture of Cu<sup>2+</sup>@Q-POP (1.5 g), EtOH (17.5 mL), H<sub>2</sub>O (10 mL), and NH<sub>4</sub>OH (17.5 mL, 25%). Afterward, the mixture was transferred into a 100 mL stainless steel autoclave and treated at 100 °C for 4 h. Finally, the mixture was filtered and washed with water and methanol successively. The resultant brown solid was dried under a vacuum to obtain CuNPs@Q-POP. Inductively coupled plasma (ICP) analysis displayed a Cu content of 7.3% in the CuNPs@Q-POP.

#### **Synthesis of CuNPs@Q-POP(2.8% Cu):**

To a round-bottom flask, Q-POP (1.5 g) was suspended in a mixture of MeOH (50 mL) and Et<sub>3</sub>N (1 mL). The resultant suspension was allowed to stir at room temperature for 1 h. Then, Cu(NO<sub>3</sub>)<sub>2</sub>·3H<sub>2</sub>O (0.2 g) in MeOH (6 mL) was added and refluxed for about 12 h and the resultant green Cu<sup>2+</sup>@Q-POP precipitate was filtered, washed with MeOH, and dried *in vacuo* overnight. Next, an aqueous solution of hydrazine hydrate (5 mL, 35%) was added dropwise with intense stirring under argon atmosphere to the mixture of Cu<sup>2+</sup>@Q-POP (1.5 g), EtOH (17.5 mL), H<sub>2</sub>O (10 mL), and NH<sub>4</sub>OH (17.5 mL, 25%). Then, the mixture was heated at 100 °C for 4 h in an appropriate stainless steel autoclave. Finally, the mixture was filtered and successively washed with water and methanol. Thereafter, the brown solid was dried under vacuum to obtain CuNPs@Q-POP. Inductively coupled plasma (ICP) analysis revealed that the Cu content of CuNPs@Q-POP was 2.8%.

#### **General procedure for N-arylation of anilines with aryl halides catalyzed by CuNPs@Q-POP(2.8% Cu):**

In a 25 mL round bottom flask (two necked-flask) a mixture of aryl halide (1 mmol), aniline (1.2 mmol), K<sub>2</sub>CO<sub>3</sub> (2 mmol), PEG-200 (2 mL), and CuNPs@Q-POP(2.8% Cu) catalyst (75 mg) was stirred under nitrogen atmosphere at 110 °C for 24. After the reaction, ethyl acetate (10 mL) was added to the reaction mixture and the catalyst was separated by filtration and washed with ethyl acetate. Then, water (10 mL) was added to the filtrate and further extracted with ethyl acetate (2 × 10 mL). The extracted organic phases were combined and dried with anhydrous MgSO<sub>4</sub>. The organic phase was analyzed by GC to determine conversion and selectivity. The conversions were assessed according to the concentration of iodobenzene. Then the solvent was removed under reduced pressure and the crude product was purified by column chromatography over silica gel to obtain the desired product. The product was analyzed by <sup>1</sup>H-NMR and <sup>13</sup>C-NMR.

#### **General procedure for recyclability of the catalyst.**

To examine the recyclability of CuNPs@Q-POP, the *N*-arylation of iodobenzene with aniline was performed under the similar condition as mentioned above. After the completion of the reaction, the catalyst was separated from the mixture reaction by filtration and washed three times with water, ethyl acetate, and methanol, then dried under vacuum at 100°C for 12h. Finally, the reused catalyst was exerted for the next run under optimum condition.

**CCDC Number: 1953774**

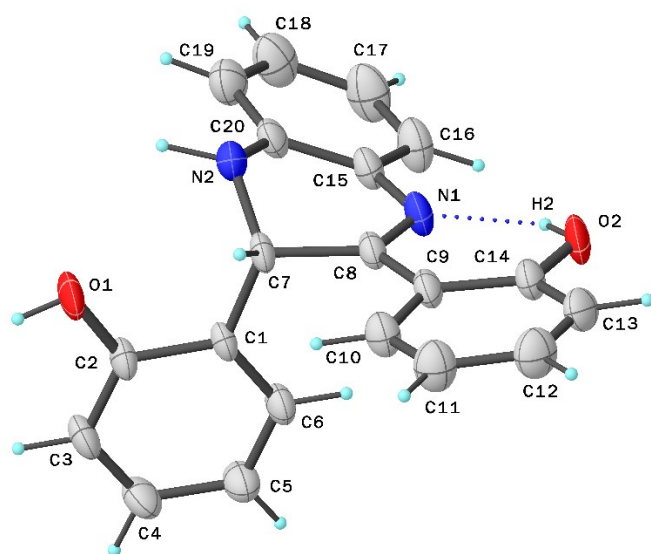

ORTEP representation of compound **B**.

**Table 1. Crystal data and structure refinement for compound B.**

|                     |                                                               |
|---------------------|---------------------------------------------------------------|
| Identification code | shelx                                                         |
| Empirical formula   | C <sub>20</sub> H <sub>16</sub> N <sub>2</sub> O <sub>2</sub> |
| Formula weight      | 316.35                                                        |
| Temperature         | 298(2) K                                                      |
| Wavelength          | 0.71073 Å                                                     |



|             |          |
|-------------|----------|
| N(1)-C(15)  | 1.397(4) |
| C(8)-C(9)   | 1.460(4) |
| C(8)-C(7)   | 1.525(4) |
| C(7)-N(2)   | 1.467(4) |
| C(7)-C(1)   | 1.524(4) |
| C(1)-C(6)   | 1.387(4) |
| C(1)-C(2)   | 1.416(4) |
| C(9)-C(10)  | 1.408(5) |
| C(9)-C(14)  | 1.425(4) |
| N(2)-C(20)  | 1.388(4) |
| N(2)-H(2A)  | 0.99(4)  |
| C(3)-C(4)   | 1.368(5) |
| C(3)-C(2)   | 1.383(5) |
| C(6)-C(5)   | 1.372(5) |
| C(15)-C(16) | 1.391(5) |
| C(15)-C(20) | 1.406(5) |
| C(13)-C(12) | 1.368(6) |
| C(13)-C(14) | 1.376(5) |
| C(10)-C(11) | 1.372(5) |
| C(20)-C(19) | 1.375(5) |
| C(4)-C(5)   | 1.402(5) |
| C(16)-C(17) | 1.364(6) |
| C(12)-C(11) | 1.402(6) |
| C(19)-C(18) | 1.377(6) |

|                   |          |
|-------------------|----------|
| C(18)-C(17)       | 1.384(6) |
| C(8)-N(1)-C(15)   | 120.1(3) |
| N(1)-C(8)-C(9)    | 118.3(3) |
| N(1)-C(8)-C(7)    | 120.1(3) |
| C(9)-C(8)-C(7)    | 121.6(3) |
| N(2)-C(7)-C(1)    | 113.8(3) |
| N(2)-C(7)-C(8)    | 106.0(2) |
| C(1)-C(7)-C(8)    | 111.5(2) |
| C(6)-C(1)-C(2)    | 118.4(3) |
| C(6)-C(1)-C(7)    | 124.5(3) |
| C(2)-C(1)-C(7)    | 117.0(3) |
| C(10)-C(9)-C(14)  | 117.8(3) |
| C(10)-C(9)-C(8)   | 121.6(3) |
| C(14)-C(9)-C(8)   | 120.6(3) |
| C(20)-N(2)-C(7)   | 115.9(3) |
| C(4)-C(3)-C(2)    | 120.6(3) |
| O(1)-C(2)-C(3)    | 123.9(3) |
| O(1)-C(2)-C(1)    | 116.5(3) |
| C(3)-C(2)-C(1)    | 119.6(3) |
| C(5)-C(6)-C(1)    | 122.0(3) |
| C(16)-C(15)-N(1)  | 120.4(3) |
| C(16)-C(15)-C(20) | 119.5(3) |
| N(1)-C(15)-C(20)  | 119.8(3) |
| C(12)-C(13)-C(14) | 121.5(4) |



|                   |          |
|-------------------|----------|
| O(2)-C(14)-C(13)  | 120.0(3) |
| O(2)-C(14)-C(9)   | 120.4(3) |
| C(13)-C(14)-C(9)  | 119.6(3) |
| C(11)-C(10)-C(9)  | 121.3(3) |
| C(19)-C(20)-N(2)  | 123.6(3) |
| C(19)-C(20)-C(15) | 119.5(3) |
| N(2)-C(20)-C(15)  | 116.7(3) |
| C(3)-C(4)-C(5)    | 120.7(3) |
| C(6)-C(5)-C(4)    | 118.7(3) |
| C(17)-C(16)-C(15) | 120.1(4) |
| C(13)-C(12)-C(11) | 119.9(4) |
| C(20)-C(19)-C(18) | 120.1(4) |
| C(10)-C(11)-C(12) | 119.7(4) |
| C(19)-C(18)-C(17) | 120.5(4) |
| C(16)-C(17)-C(18) | 120.1(4) |

---

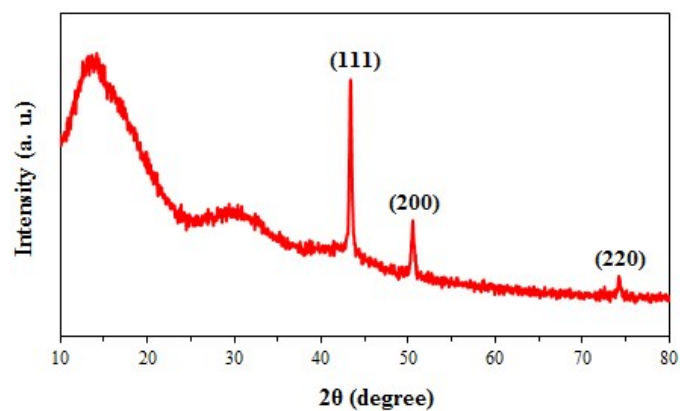

**Figure S1.** Wide angle powder XRD patterns of reused of CuNPs@Q-POP for *N*-arylation of iodobenzene with aniline.

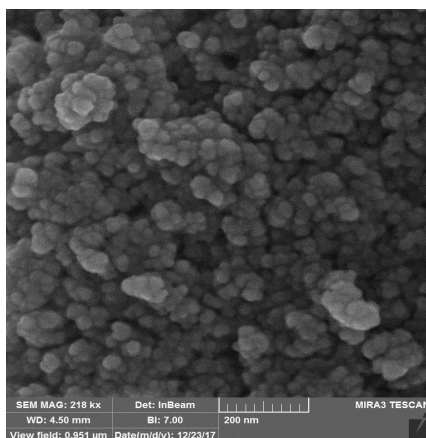

**Figure S2.** SEM image of reused CuNPs@Q-POP for *N*-arylation of iodobenzene with aniline.

## The NMR spectral data of the products

### *N*-phenylaniline

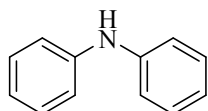

White solid, m.p. 52-53 °C; <sup>1</sup>H NMR (400 MHz, CDCl<sub>3</sub>): δ (ppm)=7.33-7.28 (m, 4H), 7.12-7.10 (m, 4H), 6.99-6.95 (m, 2H), 5.73 (s, 1H); <sup>13</sup>C NMR (100 MHz, CDCl<sub>3</sub>): δ (ppm)=142.6, 128.9, 120.5, 117.3.

### *N*-(4-methoxyphenyl)aniline

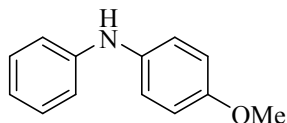

Pale yellow solid, m.p. 103 °C; <sup>1</sup>H NMR (400 MHz, CDCl<sub>3</sub>): δ (ppm)= 7.17-7.12 (m, 2H), 7.03-6.99 (m, 2H), 6.86-6.74 (m, 5H); <sup>13</sup>C NMR (100 MHz, CDCl<sub>3</sub>): δ (ppm)=155.3, 145.2, 135.7, 129.3, 122.2, 119.6, 115.6, 114.7, 55.6.

### *N*-(4-methylphenyl)aniline

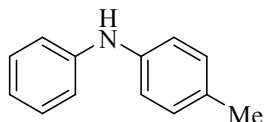

Pale yellow solid, m.p. 81 °C;  $^1\text{H}$  NMR (400 MHz,  $\text{CDCl}_3$ ):  $\delta$  (ppm)=7.17-7.15 (m, 2H), 7.03-7.01 (m, 2H), 6.95-6.92 (m, 4H), 6.83-6.79 (m, 1H), 5.53 (s, 1H), 2.23 (s, 3H);  $^{13}\text{C}$  NMR (100 MHz,  $\text{CDCl}_3$ ):  $\delta$  (ppm)=130.9, 129.8, 129.7, 129.3, 122.7, 120.3, 118.9, 116.9, 20.7.

#### ***N*-(2-methoxyphenyl)aniline**

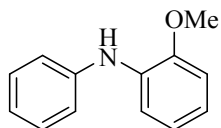

Yellowish oil;  $^1\text{H}$  NMR (400 MHz,  $\text{CDCl}_3$ ):  $\delta$  (ppm)=7.33-7.30 (m, 3H), 7.17 (d,  $J=8$  Hz, 2H), 6.98-9.85 (m, 4H), 6.16 (s, 1H), 3.91 (s, 3H);  $^{13}\text{C}$  NMR (100 MHz,  $\text{CDCl}_3$ ):  $\delta$  (ppm)=129.3, 128.8, 121.13, 120.8, 119.9, 118.6, 114.6, 110.5, 55.6.

#### ***N*-(3-methoxyphenyl)aniline**

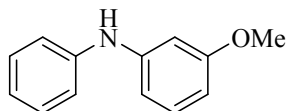

Yellowish oil;  $^1\text{H}$  NMR (400 MHz,  $\text{CDCl}_3$ ):  $\delta$  (ppm)=7.32-7.28 (m, 2H), 7.22-7.19 (m, 1H), 7.12 (d,  $J=8$  Hz, 2H), 6.97 (t,  $J=8$  Hz, 1H), 6.69-6.66 (m, 2H), 6.52-6.50 (m, 1H), 5.74 (s, 1H), 3.81 (s, 3H);  $^{13}\text{C}$  NMR (100 MHz,  $\text{CDCl}_3$ ):  $\delta$  (ppm)=160.2, 144.1, 142.3, 129.6, 128.8, 120.8, 117.8, 109.7, 105.6, 102.8, 54.7.

#### ***N*-(4-nitrophenyl)aniline**

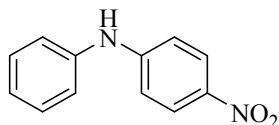

Yellow solid, m.p. 130 °C;  $^1\text{H}$  NMR (400 MHz,  $\text{CDCl}_3$ ):  $\delta$  (ppm)=8.05 (d,  $J=8$  Hz, 2H), 7.34-7.30 (m, 2H), 7.15-7.08 (m, 3H), 6.87 (d,  $J=8$  Hz, 2H), 6.21 (s, 1H);  $^{13}\text{C}$  NMR (100 MHz,  $\text{CDCl}_3$ ):  $\delta$  (ppm)=150.3, 139.7, 139.5, 129.7, 126.2, 124.7, 121.9, 113.7.

#### ***N*-(4-chlorophenyl)aniline**

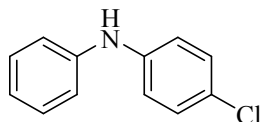

Pale yellow solid, m.p. 71-72 °C;  $^1\text{H}$  NMR (400 MHz,  $\text{CDCl}_3$ ):  $\delta$  (ppm)=7.23-7.20 (m, 2H), 7.14 (d,  $J=8$  Hz, 2H), 6.99-6.97 (m, 2H), 6.92 (d,  $J=8$  Hz, 2H), 6.88-6.87 (m, 1H);  $^{13}\text{C}$  NMR (100 MHz,  $\text{CDCl}_3$ ):  $\delta$  (ppm)=142.6, 141.9, 129.4, 129.3, 121.5, 118.8, 118.1.

### ***N*-(2-chlorophenyl)aniline**

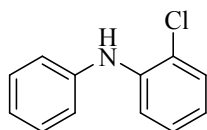

Yellowish oil;  $^1\text{H}$  NMR (400 MHz,  $\text{CDCl}_3$ ):  $\delta$  (ppm)=7.29-7.21 (m, 4H), 7.10-7.03 (m, 3H), 6.97 (t,  $J=8$  Hz, 1H), 6.75-6.71 (m, 1H), 6.03 (s, 1H);  $^{13}\text{C}$  NMR (100 MHz,  $\text{CDCl}_3$ ):  $\delta$  (ppm)=141.5, 129.7, 129.4, 127.4, 122.6, 120.4, 120.2, 115.5.

### ***N*-phenylindole**

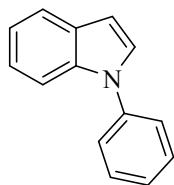

Colorless solid, m.p. 60-62 °C;  $^1\text{H}$  NMR (400 MHz,  $\text{CDCl}_3$ ):  $\delta$  (ppm)=7.79-7.76 (m, 1H), 7.66-7.64 (m, 1H), 7.59-7.56 (m, 4H), 7.44-7.40 (m, 2H), 7.33-7.25 (m, 2H), 6.77-6.76 (m, 1H);  $^{13}\text{C}$  NMR (100 MHz,  $\text{CDCl}_3$ ):  $\delta$  (ppm)=139.9, 135.9, 129.7, 129.4, 128.0, 126.5, 124.4, 122.4, 121.2, 120.4, 110.6, 103.6.

# Copies of <sup>1</sup>H NMR and <sup>13</sup>C NMR spectra

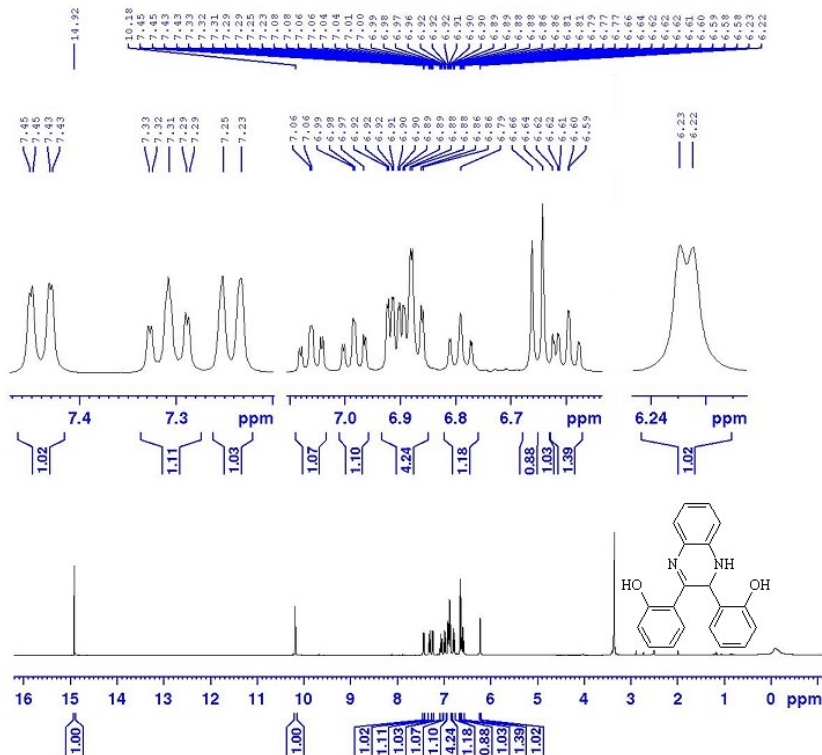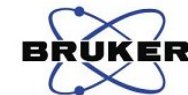

Current Data Parameters  
 NAME Gxyingpoo- Pooeogh-IN987  
 EXPNO 10  
 PROCNO 1

F2 - Acquisition Parameters  
 Date\_ 20190925  
 Time 13.00  
 INSTRUM spect  
 PROBRD 5 mm PABBO BB-  
 PULPROG zgpg  
 TD 65536  
 SOLVENT DMSO  
 NS 32  
 DS 2  
 SWH 8802.817 Hz  
 FIDRES 0.174259 Hz  
 AQ 2.8686273 sec  
 RG 45.2  
 DW 54.800 usec  
 DE 6.50 usec  
 TE 300.0 K  
 D1 5.0000000 sec  
 TDO

----- CHANNEL f1 -----  
 NUCL1 1H  
 P1 11.00 usec  
 PL1 -2.00 dB  
 PL1W 17.51671600 W  
 SFO1 400.1326008 MHz

F2 - Processing parameters  
 SI 32768  
 SF 400.1300021 MHz  
 MSB 0  
 SSB 0  
 LB 0.30 Hz  
 GB 0  
 PC 1.00

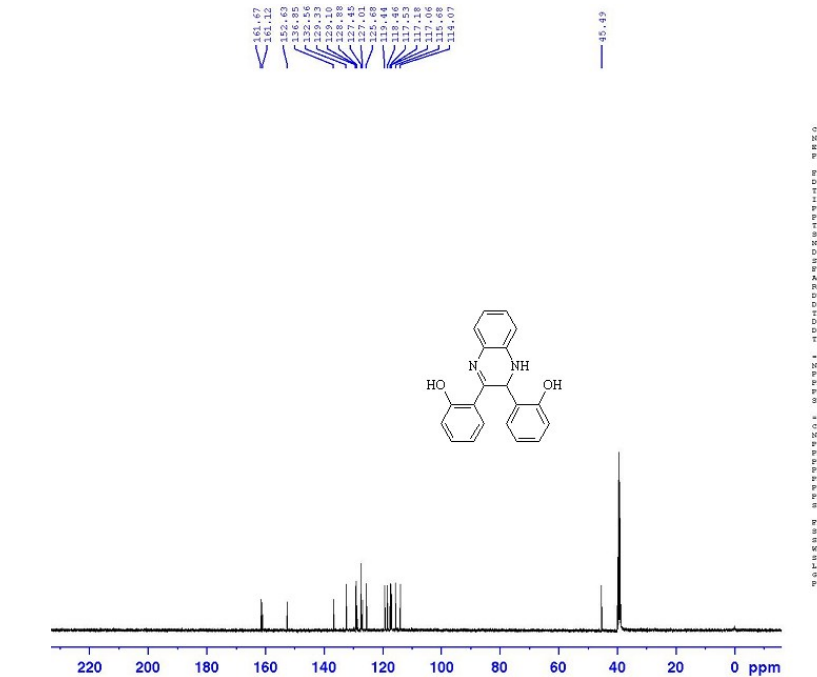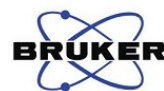

Current Data Parameters  
 NAME Gxyingpoo- Pooeogh-IN987  
 EXPNO 11  
 PROCNO 1

F2 - Acquisition Parameters  
 Date\_ 20190925  
 Time 12.50  
 INSTRUM spect  
 PROBRD 5 mm PABBO BB-  
 PULPROG zgpg  
 TD 65536  
 SOLVENT DMSO  
 NS 1500  
 DS 2  
 SWH 25332.563 Hz  
 FIDRES 0.500030 Hz  
 AQ 0.9999396 sec  
 RG 2050  
 DW 19.800 usec  
 DE 6.50 usec  
 TE 300.0 K  
 D1 1.00000000 sec  
 D11 0.03000000 sec  
 TDO 1

----- CHANNEL f1 -----  
 NUCL1 13C  
 P1 9.50 usec  
 PL1 -1.00 dB  
 PL1W 42.69075012 W  
 SFO1 100.6283694 MHz

----- CHANNEL f2 -----  
 CPDPRG2 waltz16  
 NUCL2 1H  
 P2 80.00 usec  
 PL2 0 dB  
 PL2W 15.26 dB  
 PL3 18.26 dB  
 PL3W 11.05230043 W  
 PL4W 0.32919458 W  
 PL5W 0.14640881 W  
 SFO2 400.1316005 MHz

F2 - Processing parameters  
 SI 32768  
 SF 100.6128193 MHz  
 MSB 0  
 SSB 0  
 LB 1.00 Hz  
 GB 0  
 PC 1.40

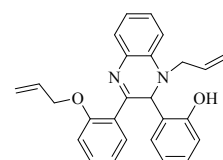



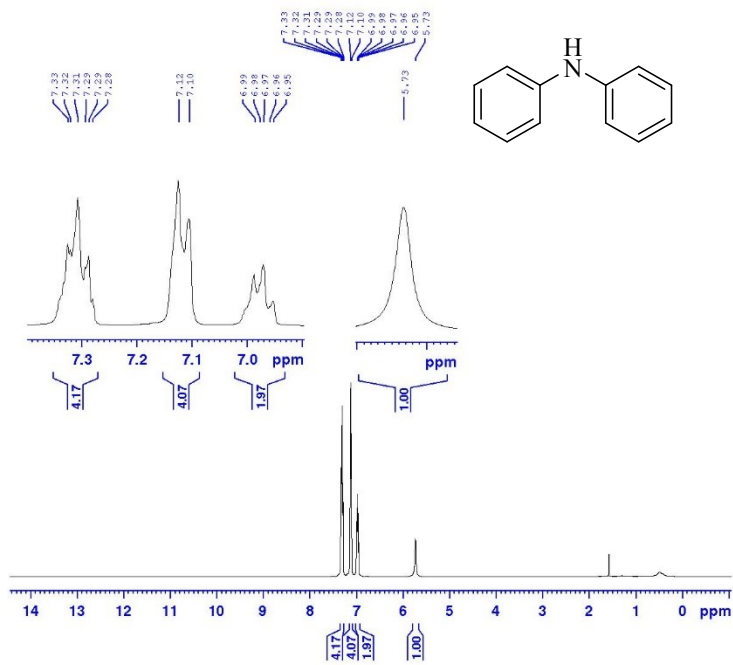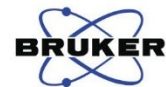

Current Data Parameters  
 NAME Gorginipur\_Puruph-IN980605  
 EXPNO 11  
 PROCNO 1

F2 - Acquisition Parameters  
 Date\_ 20190827  
 Time 14.02  
 INSTRUM spect  
 PROBRD 5 mm PABBO EB-  
 PULPROG zgpg30  
 TD 50504  
 SOLVENT CDCl3  
 NS 2  
 DS 2  
 SFR 25252.525 Hz  
 FIDRES 0.500030 Hz  
 AQ 0.9999336 sec  
 RG 2050  
 DW 19.800 usec  
 DE 6.50 usec  
 TE 295.1 K  
 D1 1.0000000 sec  
 D11 0.0300000 sec  
 TDO 1

CHANNEL f1  
 NUCL 13C  
 P1 9.50 usec  
 PL1 -1.00 dB  
 PL1W 42.69075012 W  
 SFO1 100.6283864 MHz

CHANNEL f2  
 CPDPRG2 waltz16  
 NUCL2 1H  
 P2P2 80.00 usec  
 PL2 0 dB  
 PL2 15.26 dB  
 PL3 18.26 dB  
 PL3W 11.05210045 W  
 PL12W 0.32919438 W  
 PL13W 0.16498812 W  
 SFO2 400.1316003 MHz

F2 - Processing parameters  
 SI 32768  
 ST 100.6128193 MHz  
 MCM EM  
 SEB 0  
 LB 1.00 Hz  
 GB 0  
 PC 1.40

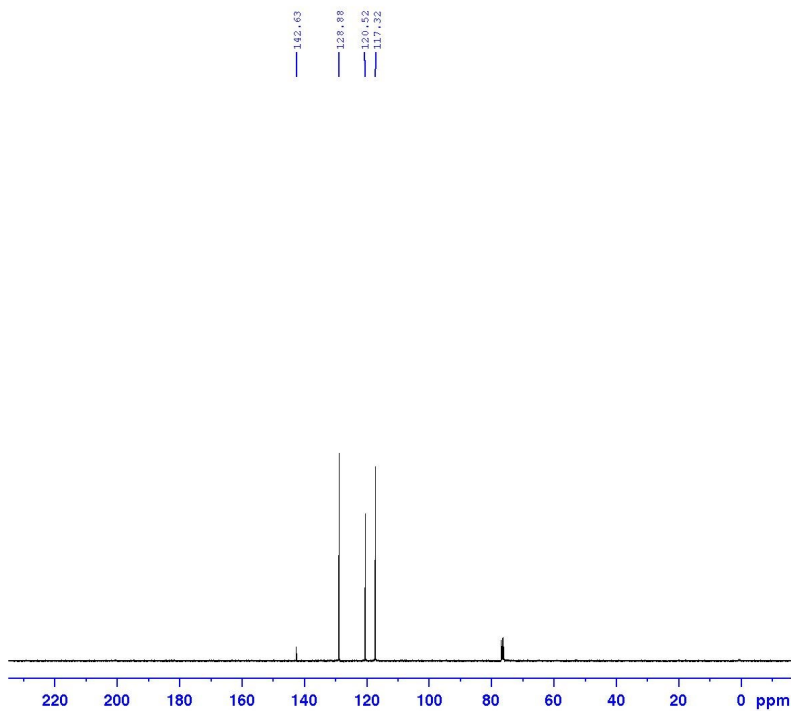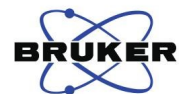

Current Data Parameters  
 NAME Gorginipur\_Puruph-IN980605  
 EXPNO 11  
 PROCNO 1

F2 - Acquisition Parameters  
 Date\_ 20190827  
 Time 14.02  
 INSTRUM spect  
 PROBRD 5 mm PABBO EB-  
 PULPROG zgpg30  
 TD 50504  
 SOLVENT CDCl3  
 NS 2  
 DS 2  
 SFR 25252.525 Hz  
 FIDRES 0.500030 Hz  
 AQ 0.9999336 sec  
 RG 2050  
 DW 19.800 usec  
 DE 6.50 usec  
 TE 295.1 K  
 D1 1.0000000 sec  
 D11 0.0300000 sec  
 TDO 1

CHANNEL f1  
 NUCL 13C  
 P1 9.50 usec  
 PL1 -1.00 dB  
 PL1W 42.69075012 W  
 SFO1 100.6283864 MHz

CHANNEL f2  
 CPDPRG2 waltz16  
 NUCL2 1H  
 P2P2 80.00 usec  
 PL2 0 dB  
 PL2 15.26 dB  
 PL3 18.26 dB  
 PL3W 11.05210045 W  
 PL12W 0.32919438 W  
 PL13W 0.16498812 W  
 SFO2 400.1316003 MHz

F2 - Processing parameters  
 SI 32768  
 ST 100.6128193 MHz  
 MCM EM  
 SEB 0  
 LB 1.00 Hz  
 GB 0  
 PC 1.40





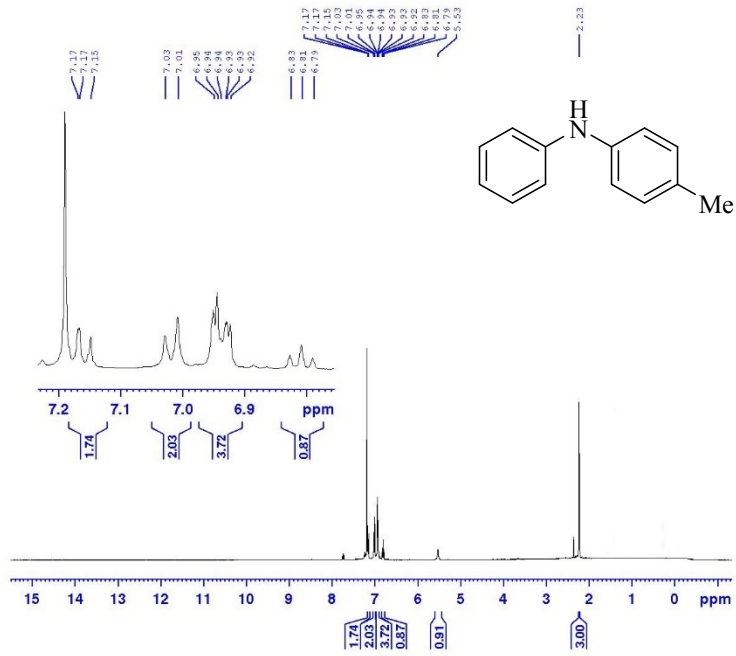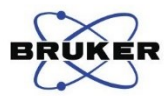

```

Current Data Parameters
NAME: 4-methyl-N-phenylbenzamide-13C-139
EXPNO: 1
PROCNO: 1
F2 - Acquisition Parameters
Date_ 20180911
Time: 10:14
INSTRUM: spect
PROBHD: 5 mm PABBO 90
PULPROG: zgpg30
PCPDPRG: zgpg30
ID: 50014
SOLVENT: DMS
NS: 512
DS: 4
SWH: 880.812 MHz
FIDRES: 0.174239 Hz
AQ: 0.6460070 sec
RG: 114
SQ: 56.800 usec
RF: 6.50 usec
RE: 237.3 W
D1: 5.0000000 sec
TD: 3.0000000 usec

----- CHANNEL f1 -----
NUC1: 13C
P1: 12.00 usec
PL1: 0.00 dB
PL12: 17.51874800 W
NUC2: 13C
P2: 400.1300384 MHz
SFO: 125.7611540 MHz
F2 - Processing parameters
SI: 32768
SF: 400.1300384 MHz
WDW: EM
SSB: 0
LB: 0.30 Hz
GB: 0
PC: 1.00
  
```

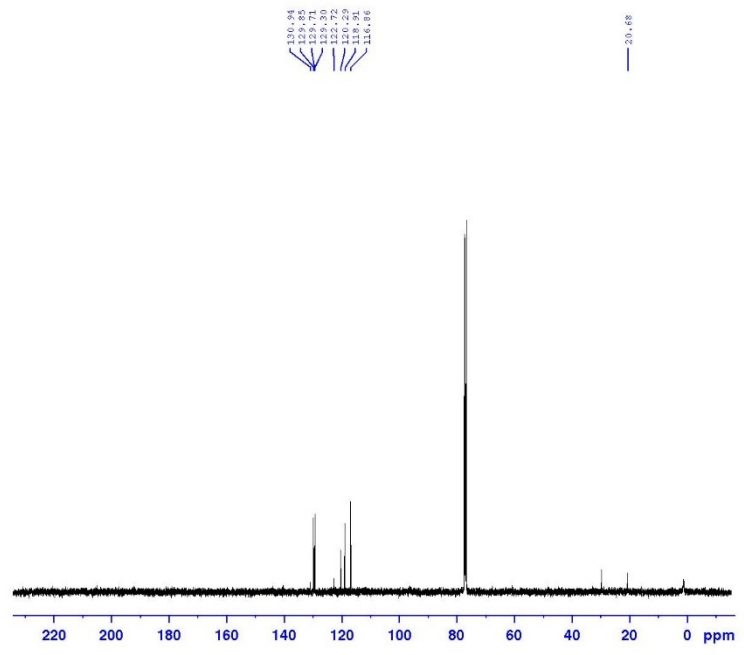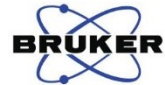

```

Current Data Parameters
NAME: 4-methyl-N-phenylbenzamide-13C-139
EXPNO: 1
PROCNO: 1
F2 - Acquisition Parameters
Date_ 20180911
Time: 09:50
INSTRUM: spect
PROBHD: 5 mm PABBO 90
PULPROG: zgpg30
PCPDPRG: zgpg30
ID: 50014
SOLVENT: DMS
NS: 512
DS: 4
SWH: 880.812 MHz
FIDRES: 0.174239 Hz
AQ: 0.6460070 sec
RG: 114
SQ: 56.800 usec
RF: 6.50 usec
RE: 237.3 W
D1: 5.0000000 sec
TD: 3.0000000 usec

----- CHANNEL f1 -----
NUC1: 13C
P1: 12.00 usec
PL1: 0.00 dB
PL12: 17.51874800 W
NUC2: 13C
P2: 400.1300384 MHz
SFO: 125.7611540 MHz
F2 - Processing parameters
SI: 32768
SF: 400.1300384 MHz
WDW: EM
SSB: 0
LB: 0.30 Hz
GB: 0
PC: 1.00
  
```

h77



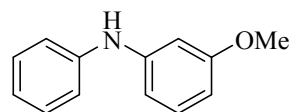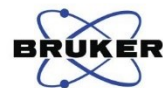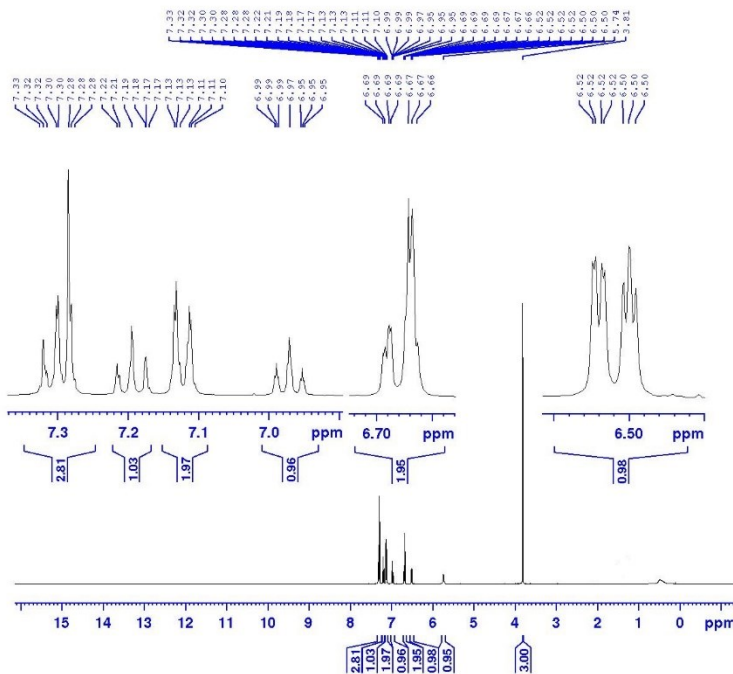

Current Data Parameters  
 NAME Gorylsur- Fuzugh-IN970607  
 EXPNO 20  
 PROCNO 1

F2 - Acquisition Parameters  
 Date\_ 20180903  
 Time 11:13  
 INSTRUM spect  
 PROBD 5 mm PABBO BB-  
 PULPROG zgpg30  
 TD 50004  
 SOLVENT CDCl3  
 NS 2  
 DS 2  
 SWH 8802.417 Hz  
 FIDRES 0.174299 Hz  
 AQ 2.8886273 sec  
 RG 71.8  
 DW 16.000 usec  
 DE 6.50 usec  
 TE 296.2 K  
 D1 5.0000000 sec  
 TD0 1

==== CHANNEL f1 =====  
 NUC1 1H  
 P1 11.00 usec  
 PL1 -2.00 dB  
 PL1W 17.51171600 W  
 SFO1 400.1326008 MHz

F2 - Processing Parameters  
 SI 32768  
 SF 400.1326008 MHz  
 MD 16  
 EQ 1H  
 LB 0.30 Hz  
 GB 0  
 PC 1.00

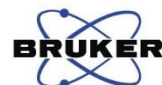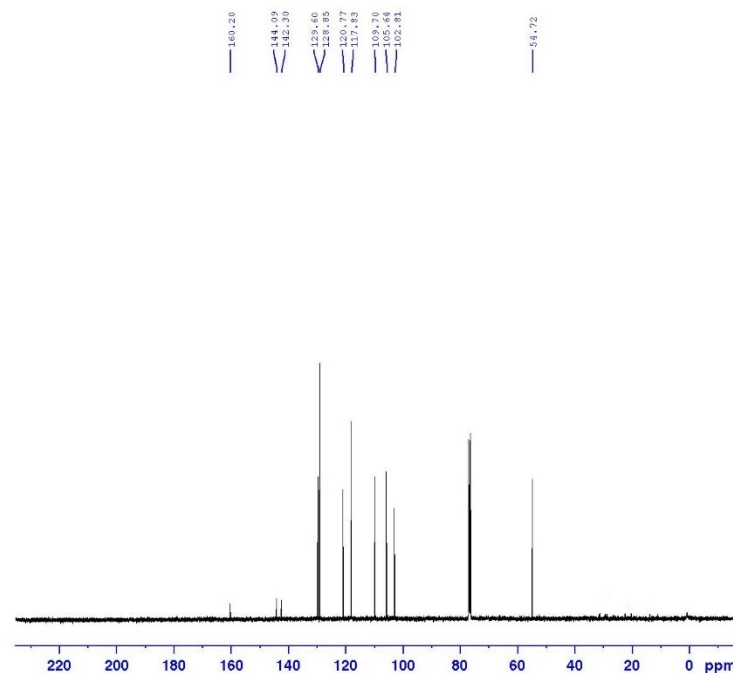

Current Data Parameters  
 NAME Gorylsur- Fuzugh-IN970607  
 EXPNO 21  
 PROCNO 1

F2 - Acquisition Parameters  
 Date\_ 20180903  
 Time 18:39  
 INSTRUM spect  
 PROBD 5 mm PABBO BB-  
 PULPROG zgpg30  
 TD 75754  
 SOLVENT CDCl3  
 NS 1324  
 DS 2  
 SWH 25252.525 Hz  
 FIDRES 0.323249 Hz  
 RG 1.493292 usec  
 EQ 2050  
 DW 19.800 usec  
 DE 6.50 usec  
 TE 297.5 K  
 D1 2.0000000 sec  
 D11 0.0300000 sec  
 TD0 1

==== CHANNEL f1 =====  
 NUC1 13C  
 P1 9.00 usec  
 PL1 -1.00 dB  
 PL1W 42.49770012 W  
 SFO1 100.6283604 MHz

==== CHANNEL f2 =====  
 CPDPRG2 waltz16  
 NS2 80.00 usec  
 P2 0 dB  
 PL2 15.26 dB  
 PL3 18.26 dB  
 PL3W 11.05230045 W  
 PL1W 0.32919458 W  
 PL1W 0.11610912 W  
 SFO2 400.1311605 MHz

F2 - Processing Parameters  
 SI 32768  
 SF 100.6181818 MHz  
 MD 16  
 EQ 1H  
 LB 1.00 Hz  
 GB 0  
 PC 1.40

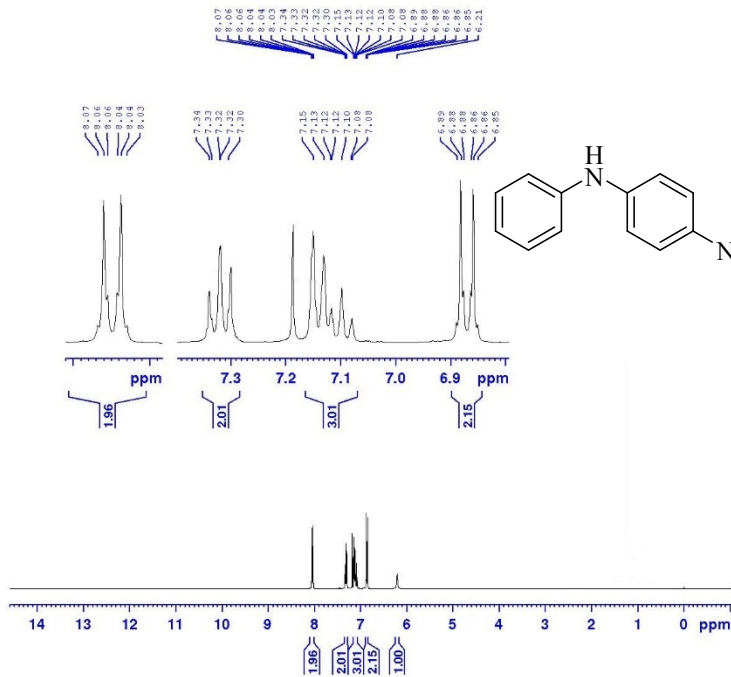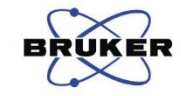

```

Current Data Parameters
NAME 4-nitrophenyl-aniline-120...15
EXPNO 1
PROCNO 1
F2 - Acquisition Parameters
Date_ 20180811
Time 12:53
INSTRUM spect
PROBHD 5 mm PABBO 80-
PULPROG zgpg30
TD 65536
SOLVENT cdd
NS 2
DS 2
SWH 8802.817 Hz
FIDRES 0.174250 Hz
AQ 75.8
RG 2.848273 ***
SQ 75.8
WDW EM
SSB 0
LB 6.50 uHz
GB 0
PC 294.8
DQ 0.0000000 sec
TE 300
----- CHANNEL f1 -----
NUC1 13
P1 11.00 uSec
PL1 -2.00 dB
PL12 17.5167100 dB
PL13 400.152000 MHz
NUC2
P2
PL2
PL12
PL13
PC
----- Processing parameters -----
SI 400.152000 MHz
SF 400.152000 MHz
WDW EM
SSB 0
LB 6.50 Hz
GB 0
PC 1.00
  
```

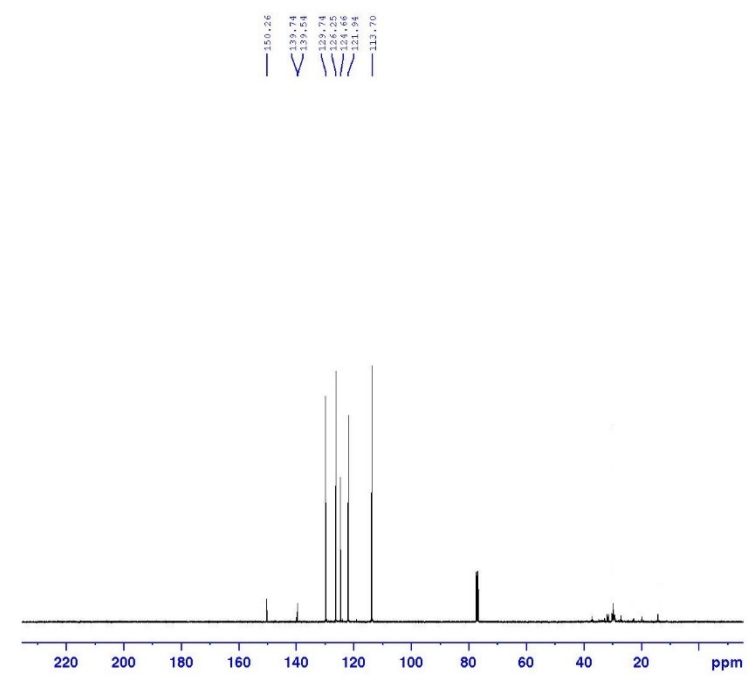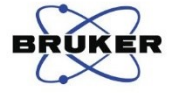

```

Current Data Parameters
NAME 4-nitrophenyl-aniline-150...15
EXPNO 1
PROCNO 1
F2 - Acquisition Parameters
Date_ 20180811
Time 8:30
INSTRUM spect
PROBHD 5 mm PABBO 80-
PULPROG zgpg30
TD 65536
SOLVENT cdd
NS 2
DS 2
SWH 8802.817 Hz
FIDRES 0.174250 Hz
AQ 75.8
RG 2.848273 ***
SQ 75.8
WDW EM
SSB 0
LB 6.50 uHz
GB 0
PC 294.8
DQ 0.0000000 sec
TE 300
----- CHANNEL f1 -----
NUC1 130
P1 1.00 uSec
PL1 -1.00 dB
PL12 82.6975000 dB
PL13 400.152000 MHz
NUC2
P2
PL2
PL12
PL13
PC
----- Processing parameters -----
SI 400.152000 MHz
SF 400.152000 MHz
WDW EM
SSB 0
LB 6.50 Hz
GB 0
PC 1.40
  
```

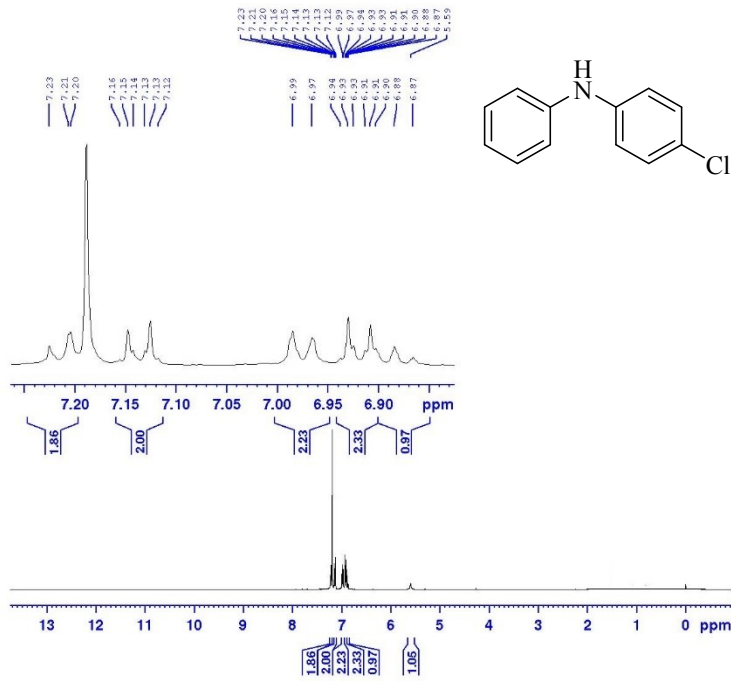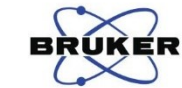

**Current Data Parameters**  
 NAME: Sample004 - Run=INPT0059-274...27  
 EXPNO: 1  
 PROCNO: 1  
 F2 - Acquisition Parameters  
 Date\_ : 20080611  
 Time : 12.49  
 P1: 6.00  
 P2: 5.00  
 FIDRES: 0.000047 Hz  
 AQ: 0.16270000 Hz  
 RG: 655  
 DD: 1.00  
 DE: 2.00  
 TE: 300.2 K  
 D1: 1.00  
 DELTADelta: 0.00000000 Hz  
 SFO1: 400.1262600 MHz  
 F2 - Processing parameters  
 SI: 32768  
 SF: 400.1262600 MHz  
 DDF: 1.00  
 LQ: 0.00 Hz  
 GB: 0  
 SC: 1.00

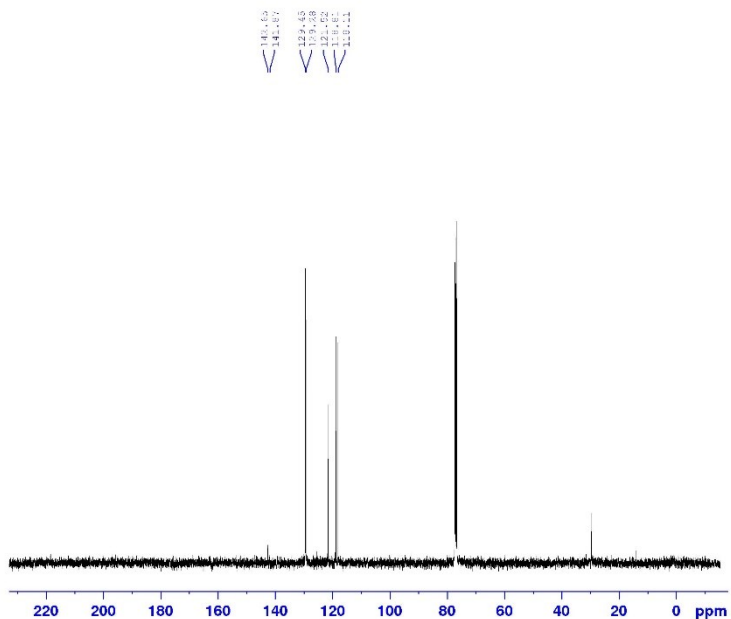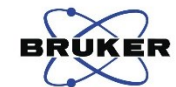

**Current Data Parameters**  
 NAME: Sample004 - Run=INPT0059-274...27  
 EXPNO: 1  
 PROCNO: 1  
 F2 - Acquisition Parameters  
 Date\_ : 20080611  
 Time : 12.49  
 P1: 6.00  
 P2: 5.00  
 FIDRES: 0.000047 Hz  
 AQ: 0.16270000 Hz  
 RG: 655  
 DD: 1.00  
 DE: 2.00  
 TE: 300.2 K  
 D1: 1.00  
 DELTADelta: 0.00000000 Hz  
 SFO1: 400.1262600 MHz  
 F2 - Processing parameters  
 SI: 32768  
 SF: 400.1262600 MHz  
 DDF: 1.00  
 LQ: 0.00 Hz  
 GB: 0  
 SC: 1.00

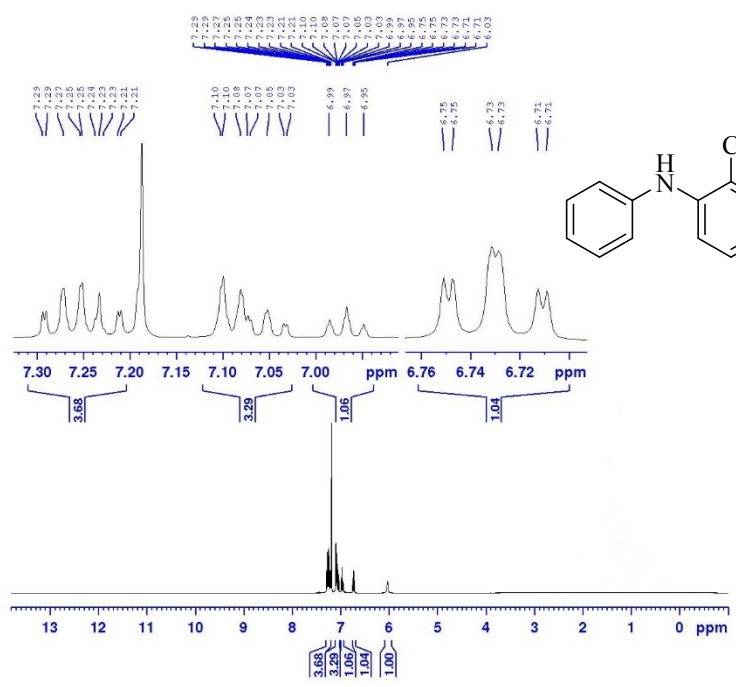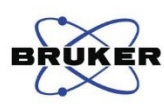

```

===== CHANNEL F1 =====
NUC1 1H
P1 11.00 uS
P2 0.00 uS
PULP 17.0000000 MHz
SFO1 400.1424000 MHz

F2 - Acquisition Parameters
Date_ 20190906
Time 12.07
INSTRUM spect
PROBHD 5 mm BBOBO
PULPROG zgpg30
SOLVENT cdc13
NS 2
DS 2
SWH 880.817 Hz
FIDRES 0.174299 Hz
AQ 2.18460712 sec
RG 314
DP 56.800 uS
DE 4.00 uS
TE 300.2 K
D1 5.0000000 sec
D11 1
===== CHANNEL F2 =====
NUC2 13C
P1 1.00 uS
P2 0.00 uS
PULP 42.5000000 MHz
SFO2 100.6238364 MHz

F2 - Processing parameters
SI 32768
SF 400.1409893 MHz
WDW EM
SSB 0
GB 0
PC 1.00
  
```

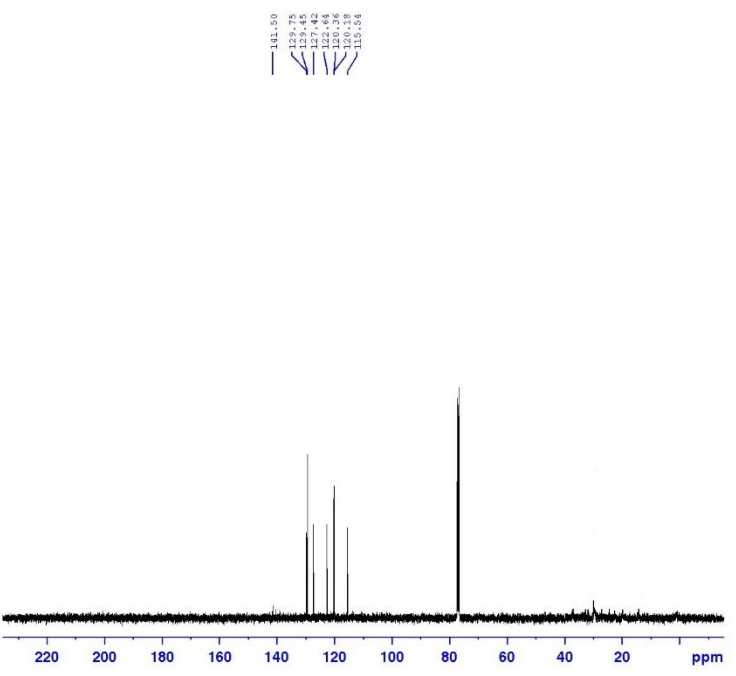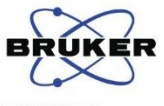

```

===== CHANNEL F1 =====
NUC1 13C
P1 1.00 uS
P2 0.00 uS
PULP 42.5000000 MHz
SFO1 100.6238364 MHz

F2 - Acquisition Parameters
Date_ 20190906
Time 13.00
INSTRUM spect
PROBHD 5 mm BBOBO
PULPROG zgpg30
SOLVENT cdc13
NS 2
DS 2
SWH 2550.000 MHz
FIDRES 0.2000000 MHz
AQ 0.39999996 sec
RG 401
DP 13.800 uS
DE 4.00 uS
TE 300.2 K
D1 1.0000000 sec
D11 0.2000000 sec
TSD 1
===== CHANNEL F2 =====
NUC2 1H
P1 1.00 uS
P2 0.00 uS
PULP 42.5000000 MHz
SFO2 100.6238364 MHz

F2 - Processing parameters
SI 32768
SF 400.1409893 MHz
WDW EM
SSB 0
GB 0
PC 1.00
  
```

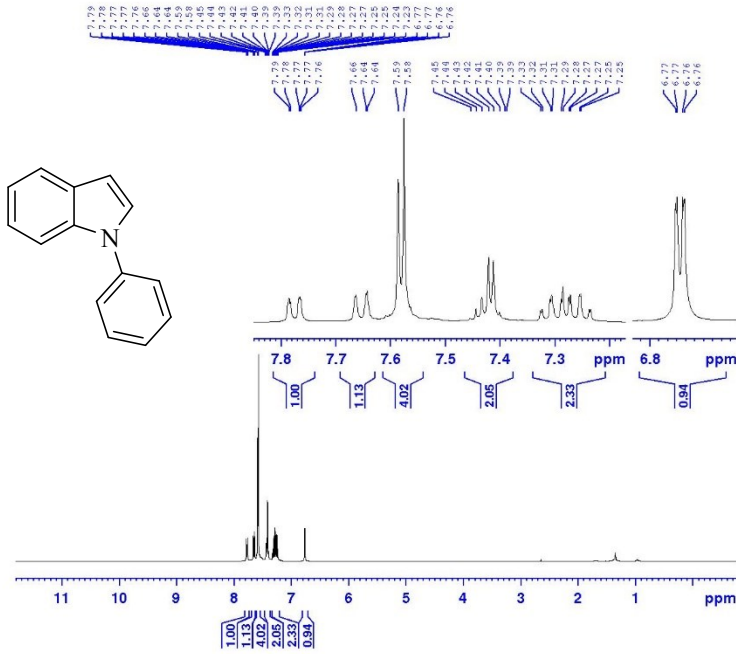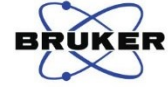

```

Current Data Parameters
NAME: Gsepuppp_02
EXPNO: 1
PROCNO: 1
F2 - Acquisition Parameters
Date_: 20100112
Time: 09.27
INSTRUM: spect
PROBHD: 5 mm PABBO 1H-
PULPROG: zgpg30
TD: 65536
SOLVENT: CDCl3
AQ: 0.32000000
RG: 256
SI: 256
SF: 500.136000 MHz
FIDRES: 0.116000 Hz
AQ: 4.3110000 s
RG: 0.0000000
SQ: 0.0000000
SSB: 0
LB: 0.0000000 Hz
GB: 0
PC: 0.0000000 s
DE: 0.0000000
TE: 300.2
NUC1: 13
===== CHANNEL f1 =====
NUC1: 13
P1: 12.00
PL1: 0.00
PULSE: 17.5147000 MHz
===== CHANNEL f2 =====
F2 - Processing parameters
SI: 65536
SF: 500.136000 MHz
MSB: 0
MSX: 0
LA: 0
GB: 0
PC: 1.00
  
```

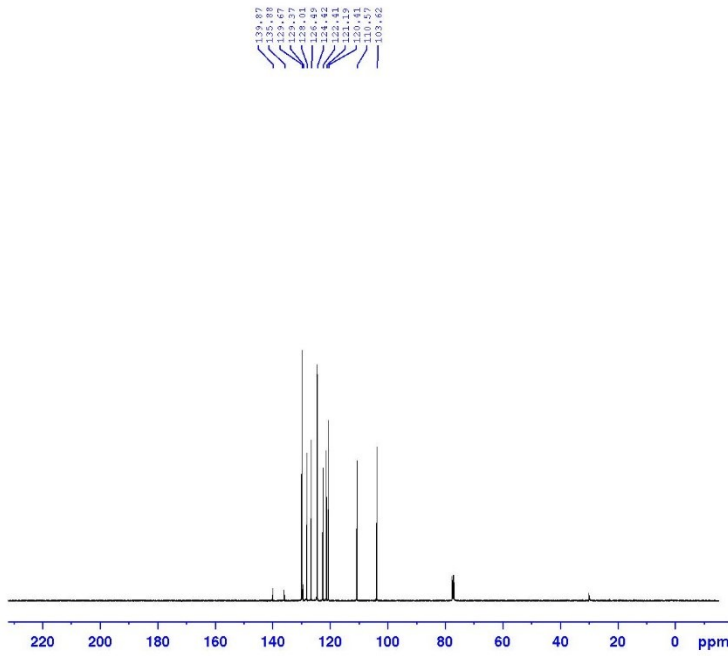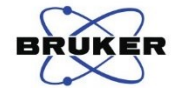

```

Current Data Parameters
NAME: Gsepuppp_02
EXPNO: 1
PROCNO: 1
F1 - Acquisition Parameters
Date_: 20100112
Time: 09.27
INSTRUM: spect
PROBHD: 5 mm PABBO 1H-
PULPROG: zgpg30
TD: 65536
SOLVENT: CDCl3
AQ: 0.32000000
RG: 256
SI: 256
SF: 500.136000 MHz
FIDRES: 0.116000 Hz
AQ: 4.3110000 s
RG: 0.0000000
SQ: 0.0000000
SSB: 0
LB: 0.0000000 Hz
GB: 0
PC: 0.0000000 s
DE: 0.0000000
TE: 300.2
NUC1: 13
===== CHANNEL f1 =====
NUC1: 13
P1: 12.00
PL1: 0.00
PULSE: 17.5147000 MHz
===== CHANNEL f2 =====
F2 - Processing parameters
SI: 65536
SF: 500.136000 MHz
MSB: 0
MSX: 0
LA: 0
GB: 0
PC: 1.00
  
```
